# Supplementary material for: Controllable vapor phase fabrication of F:Mn3O4thin films functionalized with Ag and TiO2
Source: Royal Society of Chemistry journal article supplement (doi:10.1039/c8ce00387d), 2018-01-01
Supplement: c8ce00387d1.pdf [file c8ce00387d1.pdf]

## Electronic Supplementary Information

### **Controllable vapor phase fabrication of F:Mn<sub>3</sub>O<sub>4</sub> thin films functionalized with Ag and TiO<sub>2</sub>**

Lorenzo Bigiani,<sup>a</sup> Davide Barreca,<sup>\*b</sup> Alberto Gasparotto,<sup>a</sup>

Cinzia Sada,<sup>c</sup> Sara Martí-Sánchez,<sup>d</sup> Jordi Arbiol<sup>d,e</sup> and Chiara Maccato<sup>\*a</sup>

<sup>a</sup> *Department of Chemical Sciences, Padova University and INSTM, Via F. Marzolo 1, 35131 Padova, Italy*

<sup>b</sup> *CNR-ICMATE and INSTM, Department of Chemical Sciences, Padova University, Via F. Marzolo 1, 35131 Padova, Italy*

<sup>c</sup> *Department of Physics and Astronomy, Padova University and INSTM, Via F. Marzolo 8, 35131 Padova, Italy*

<sup>d</sup> *Catalan Institute of Nanoscience and Nanotechnology (ICN2), CSIC and BIST, Bellaterra, 08193 Barcelona, Catalonia, Spain*

<sup>e</sup> *ICREA, Pg. Lluís Companys 23, 08010 Barcelona, Catalonia, Spain*

---

\* Authors to whom correspondence should be addressed; e-mail: [davide.barreca@unipd.it](mailto:davide.barreca@unipd.it) (D.B.); [chiara.maccato@unipd.it](mailto:chiara.maccato@unipd.it) (C.M.).

## S-2. Characterization

### S-2.1 X-ray diffraction (XRD)

The texture coefficient ( $TC_{hkl}$ ) has been calculated as:<sup>1-4</sup>

$$TC_{hkl} = (I_{hkl}/I_{hkl}^0) / \{(1/N) * [\sum(I_{hkl}/I_{hkl}^0)]\} \quad (S1)$$

where  $I_{hkl}$  and  $I_{hkl}^0$  are the diffracted intensities corresponding to the (hkl) planes for the target sample and the reference *hausmannite*  $Mn_3O_4$  pattern, and  $N$  is the number of reflections observed in the XRD pattern.<sup>5</sup>

The average crystallite sizes  $D$  were estimated from the patterns presented in Fig. 1 by using the Scherrer formula:<sup>1, 6-10</sup>

$$D = 0.9[\lambda / (FWHM * \cos\theta)] \quad (S2)$$

where  $\lambda$  is the excitation wavelength (0.15418 nm), whereas  $2\theta$  and FWHM are the angular position and the full width at half maximum of the observed diffraction peaks.

The dislocation density ( $\delta$ ) and microstrain ( $\varepsilon$ ) values have been estimated from the (211) peak, the most intense in the reference  $\alpha$ - $Mn_3O_4$  powder spectrum, through the following equations:<sup>1, 3, 6, 9</sup>

$$\delta = 1/D^2 \quad (S3)$$

$$\varepsilon = FWHM / (4 * \tan\theta) \quad (S4)$$

### S-2.2 Secondary ion mass spectrometry (SIMS)

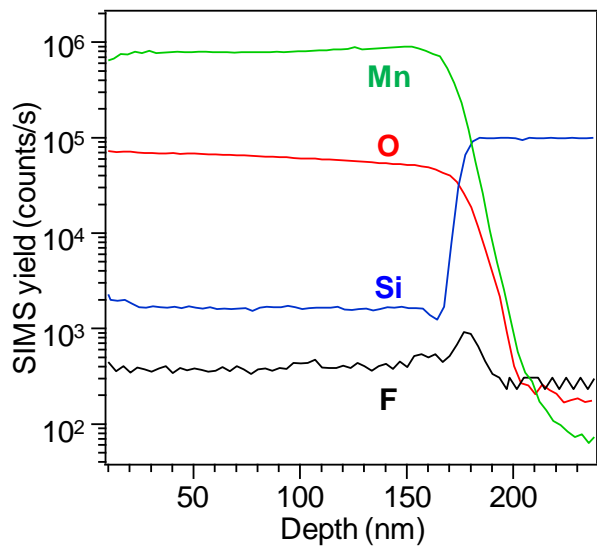

**Fig. S1** SIMS depth profile for a F:Mn<sub>3</sub>O<sub>4</sub> thin film deposited at 400°C. The increase in F signal detected at the interface between the deposit and the Si substrate can be related to variations in fluorine sputtering upon passing from the Mn<sub>3</sub>O<sub>4</sub> nanodeposit to silicon.

### S-2.3 X-ray photoelectron spectroscopy (XPS)

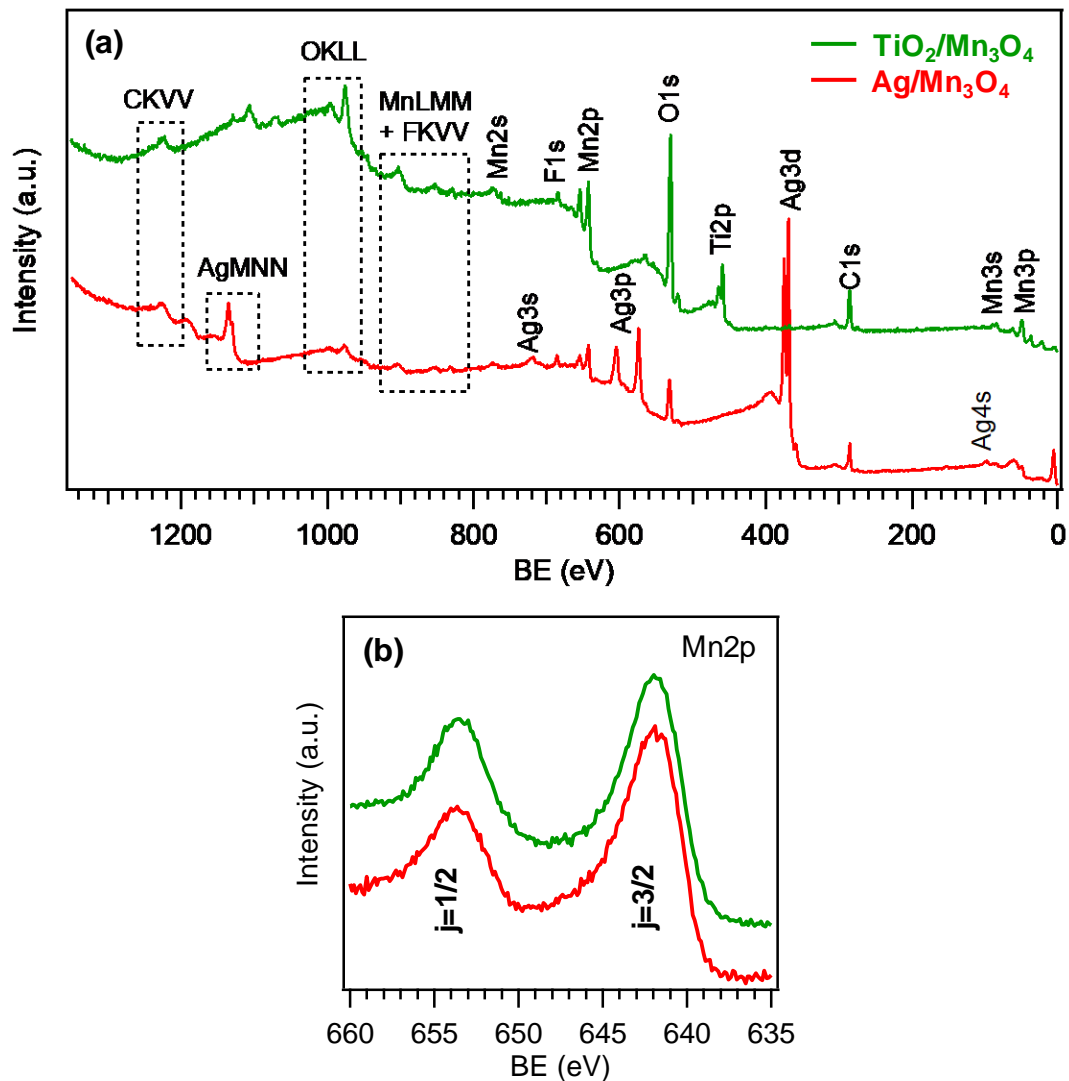

**Fig. S2** (a) Surface wide-scan XP spectra of  $\text{Ag}/\text{F}:\text{Mn}_3\text{O}_4$  and  $\text{TiO}_2/\text{F}:\text{Mn}_3\text{O}_4$  samples, along with the corresponding detailed Mn2p photopeaks (b).

### S-2.4 Atomic force microscopy (AFM)

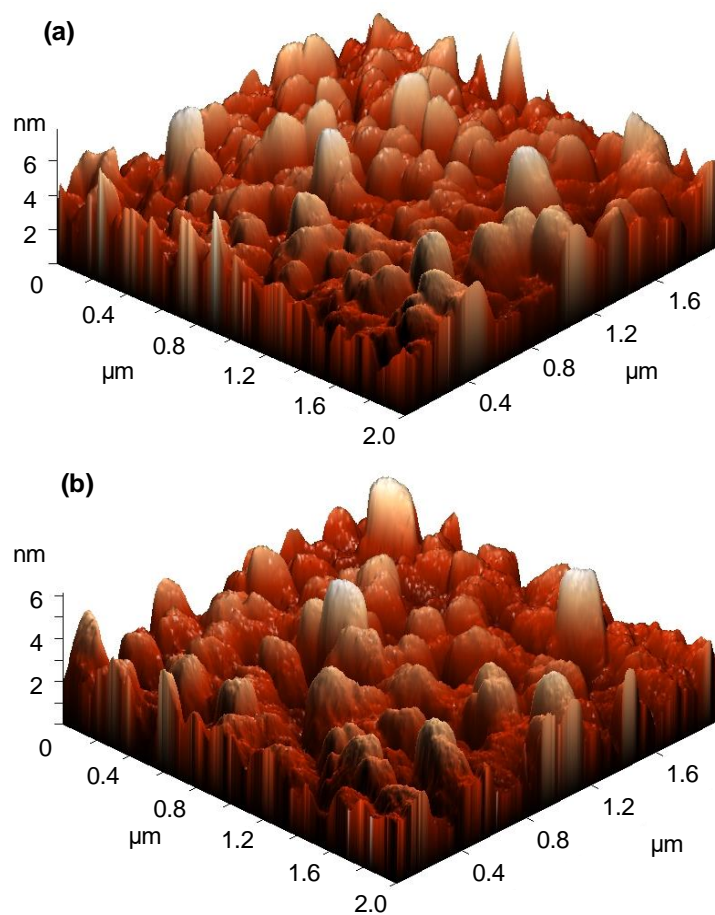

**Fig. S3** Representative AFM micrographs for: (a) Ag/F:Mn<sub>3</sub>O<sub>4</sub>; (b) TiO<sub>2</sub>/F:Mn<sub>3</sub>O<sub>4</sub> samples. RMS roughness values are close to 1.0 nm for both specimens.

## S-2.5 Transmission electron microscopy (TEM) and energy dispersive X-ray spectroscopy (EDXS)

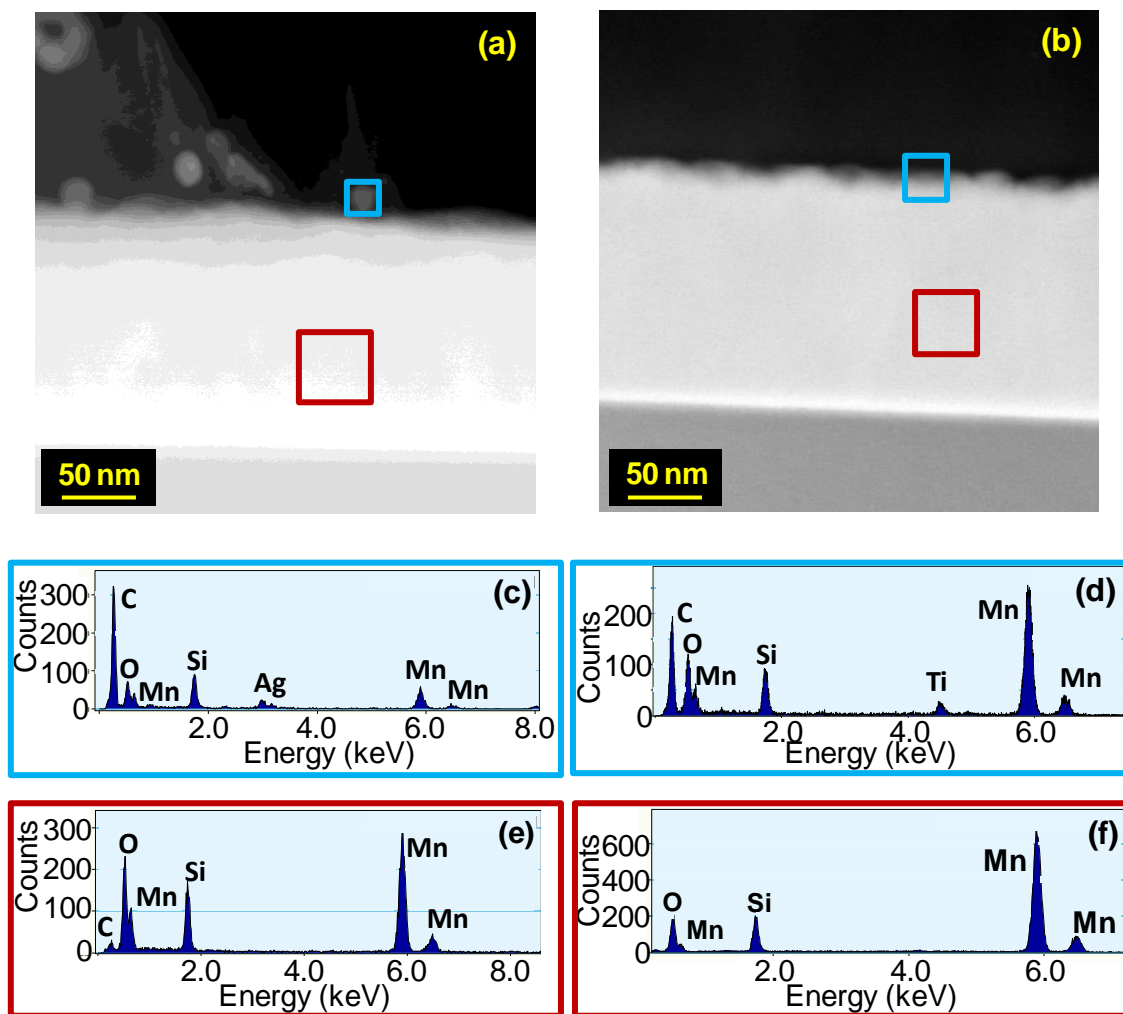

**Fig. S4** Cross-sectional low magnification HAADF-STEM micrographs for (a) Ag/F:Mn<sub>3</sub>O<sub>4</sub> and (b) TiO<sub>2</sub>/F:Mn<sub>3</sub>O<sub>4</sub> specimens. Corresponding EDXS spectra recorded in the marked areas for (c,e) Ag/F:Mn<sub>3</sub>O<sub>4</sub> and (d,f) TiO<sub>2</sub>/F:Mn<sub>3</sub>O<sub>4</sub> samples.

## References

1. T. Larbi, B. Ouni, A. Boukhachem, K. Boubaker and M. Amlouk, *Mater. Res. Bull.*, 2014, **60**, 457-466.
2. P. K. K. Kumarasinghe, A. Dissanayake, B. M. K. Pemasiri and B. S. Dassanayake, *J. Mater. Sci. - Mater. Electron.*, 2017, **28**, 276-283.
3. S. Dias, B. Murali and S. B. Krupanidhi, *Sol. Energy Mater. Sol. Cells*, 2015, **143**, 152-158.
4. S. Gangopadhyay, R. Acharya, A. K. Chattopadhyay and S. Paul, *Vacuum*, 2010, **84**, 843-850.
5. Pattern N° 024-0734, JCPDS (2000).
6. M. A. Amara, T. Larbi, A. Labidi, M. Karyaoui, B. Ouni and M. Amlouk, *Mater. Res. Bull.*, 2016, **75**, 217-223.
7. D. P. Dubal, D. S. Dhawale, R. R. Salunkhe, V. J. Fulari and C. D. Lokhande, *J. Alloys Compd.*, 2010, **497**, 166-170.
8. D. P. Dubal, D. S. Dhawale, R. R. Salunkhe, S. M. Pawar and C. D. Lokhande, *Appl. Surf. Sci.*, 2010, **256**, 4411-4416.
9. T. Larbi, M. H. Lakhdar, A. Amara, B. Ouni, A. Boukhachem, A. Mater and M. Amlouk, *J. Alloys Compd.*, 2015, **626**, 93-101.
10. M. R. Belkhedkar and A. U. Ubale, *Jo. Mol. Struct.*, 2014, **1068**, 94-100.
